# Supplementary material
Source: Research Square preprint supplement (doi:10.21203/rs.3.rs-7158117/v4)
Supplement: Supplementary file 1 [file 80fbe0c9ba021f1b836074c7.docx]

## Appendix A. Calculating the Uncertainty Envelope (UE) using a statistical approach

As explained in preceding sections, UE limits are set based on the reference pressure derivative (i.e., the response below the fracture opening pressure). This section elaborates a practical statistical approach to quantity the limits of Uncertainty Envelope (UE) around the reference noisy pressure (Bourdet) derivative curve by calculating the trend of mean (), standard deviation () (Smith, 2003), and forming Upper Limit () and Lower Limit () where a multiplier () is used to tune (increase or decrease) the UE width.

The approach consists of:

- Obtaining flowing pressure transient responses based on the injection rate (Figure 16a)
- Calculating Bourdet derivatives (Equations 7-9) and plotting in the log-log plot (Figure 16b)
- Calculating the mean (Equation 17) and standard deviation (Equation 18) of the noisy derivative data set
- Calculating the UE Lower and Upper limit based on Equations 19-20

Application of this approach is demonstrated using a simple example in Figure 16 showing a synthetic single step injection simulated by considering a vertical well in infinite acting reservoir. Noisy rate input was used in simulation to generate natural noise in the pressure response. The noise was added to the injection rate using random-data generator around the base rate of 1600 m3/D and 1.5% noise (Figure 16a). Perturbing injection rates works as a better reflection of operational uncertainty (rate naturally fluctuates and is hardly stable during flowing period) and produces natural noisy pressure response which is further amplified by Bourdet derivative (Figure 16b).

The case example (Figure 16) for vertical well in infinite acting reservoir has a characteristic feature in Bourdet derivative where the early-time slope changes much more than late-time. The early time is controlled by the wellbore storage and transitional flow behavior while later time typically shows a stable horizontal trend of Infinite Acting Radial Flow (IARF) regime (Bourdet, 2002). Therefore, this approach is demonstrated only by considering the late-time behavior, i.e. after 1 hours, where one expects the late-time data to lie scattered around a horizontal curve (a fixed mean value). Also, the late-time is the most important part used in demonstrating leakage detection methods.

Consider the late-time subset () of the pressure derivative () data points for the time () where is the time at start of IARF (start of constant horizontal slope, e.g., hr):

| Let } with size | (16) |
| --- | --- |
|  | (17) |
|  | (18) |
|  | (19) |
|  | (20) |

Where is the mean, is the standard deviation, is the total number of data samples (size of the subset), is the data index, is the data value (pressure derivative), is the multiplier.

Figure 16b shows the noisy points scattering around the constant mean (4.8 bar) while remaining within its neighborhood at standard deviation of 0.2 bar for the considered period above 1 hr. The multiplier (*b*) in Equations 19-20 can be used to make the UE limits tighter or more conservative. For shows tighter band (Figure 16b) where some noises are left outside the limits but using gave a wider, more conservative band (Figure 16c) that captures most of the noise around the mean and ensures most points (false positives and negatives) fall within the UE limits.

|  |  |  |
| --- | --- | --- |
| Figure 16. (a): History plot showing fluctuating flow rate and simulated pressure response during injection (a zoomed view with 5 min resolution at 5 hr); (b): Log-log plot with pressure (Bourdet) derivative which amplifies the noise (a zoomed view to show noisy data points around the mean calculated for and UE limits set using multiplier ); (c): Sensitivity to the multiplier increased four times gave a wider UE bound that contained all noise around the constant mean for period of IARF. | | |

Overall, this approach was demonstrated considering a vertical well in infinite acting reservoir (assumed in this study) ignoring reservoir heterogeneities or other boundary conditions that may influence the late time derivative behavior. Considering late-time data points that adequately have a single mean trend was sufficient for this feasibility study as it is the critical part used in testing the leakage detection method. Given that whole transient exhibits varying slopes, it would be beneficial to explore the standard deviation of a moving average (Hyndman, 2011; Mugisha et al., 2026) of pressure derivatives rather than relying on a single global mean trend; however, this remains outside the scope of the current study.
